# Supplementary material for: Behavior and neural activation patterns of non-redundant visual and acoustic signaling during courtship in an African cichlid fish
Source: Oxford University Press journal article supplement (doi:10.1242/jeb.244548), 2022-09-09
Supplement: jeb244548supp.pdf [file jeb244548supp.pdf]

**Table S1.** *Post hoc* condition \* region interaction statistics for brain nuclei showing significant differences for *cfos* cell densities.

| Region | Sensory conditions        | t                        | P      |
|--------|---------------------------|--------------------------|--------|
| nPPa   | Audio-visual vs. Auditory | T <sub>186</sub> = 4.832 | <0.001 |
| ATn    | Audio-visual vs. Auditory | T <sub>174</sub> = 2.982 | 0.0171 |
|        | Audio-visual vs. Control  | T <sub>186</sub> = 2.731 | 0.0347 |
| Vv-r   | Audio-visual vs. Auditory | T <sub>174</sub> = 7.976 | <0.001 |
|        | Audio-visual vs. Control  | T <sub>186</sub> = 4.071 | <0.001 |
|        | Control vs. Auditory      | T <sub>185</sub> = 3.88  | <0.001 |
|        | Control vs. Visual        | T <sub>186</sub> = 3.32  | 0.0059 |
|        | Visual vs. Auditory       | T <sub>189</sub> = 7.17  | <0.001 |

**Table S2.** Pearson correlation coefficients (R) and P-values (P) of discriminant function coefficients and female affiliative behaviors and male courtship behaviors. Bold indicates significant differences at P < 0.05.

|              |            |   | Female time in association zone | Female time at the barrier | Male quivers |
|--------------|------------|---|---------------------------------|----------------------------|--------------|
| Control      | Function 1 | R | -0.3502012                      | -0.1829885                 | N/A          |
|              |            | P | 0.4413                          | 0.6945                     | N/A          |
|              | Function 2 | R | -0.3968177                      | -0.3622721                 | N/A          |
|              |            | P | 0.3781                          | 0.4245                     | N/A          |
| Auditory     | Function 1 | R | -0.08566125                     | 0.118062                   | -0.3717778   |
|              |            | P | 0.8402                          | 0.7807                     | 0.3645       |
|              | Function 2 | R | 0.1932665                       | -0.1514787                 | -0.09723729  |
|              |            | P | 0.6465                          | 0.7203                     | 0.8188       |
| Visual       | Function 1 | R | -0.06753063                     | -0.06749679                | -0.6034098   |
|              |            | P | 0.8989                          | 0.8989                     | 0.2047       |
|              | Function 2 | R | -0.6627444                      | -0.5039489                 | -0.09668451  |
|              |            | P | 0.1514                          | 0.3081                     | 0.8554       |
| Audio-visual | Function 1 | R | 0.1228724                       | -0.000813068               | -0.05551924  |
|              |            | P | 0.793                           | 0.9986                     | 0.9059       |
|              | Function 2 | R | -0.7600583                      | -0.7570834                 | -0.5503829   |
|              |            | P | <b>0.04737</b>                  | <b>0.04876</b>             | 0.2005       |

**Table S3.** Pearson correlation coefficients (R) and *P*-values (P) of *cfos* cell densities in brain nuclei of subject gravid females in control conditions (non-reproductive auditory and visual signals). Bold indicates significant differences at  $P < 0.05$ .

|      |   | DI-g  | TPp   | Vv-c   | nPPa   | Vv-r         | Vc     | Vs     | Vd     | TL     | TS     |
|------|---|-------|-------|--------|--------|--------------|--------|--------|--------|--------|--------|
| ATn  | R | 0.680 | 0.706 | -0.159 | -0.103 | -0.199       | -0.136 | -0.307 | -0.339 | 0.281  | -0.298 |
|      | P | 0.093 | 0.076 | 0.733  | 0.826  | 0.669        | 0.772  | 0.502  | 0.457  | 0.541  | 0.516  |
| DI-g | R |       | 0.630 | -0.153 | -0.006 | -0.150       | 0.482  | 0.125  | -0.689 | 0.008  | -0.715 |
|      | P |       | 0.130 | 0.743  | 0.989  | 0.749        | 0.273  | 0.789  | 0.087  | 0.987  | 0.071  |
| TPp  | R |       |       | 0.198  | 0.480  | 0.371        | 0.182  | 0.311  | -0.112 | 0.410  | -0.385 |
|      | P |       |       | 0.671  | 0.275  | 0.413        | 0.696  | 0.498  | 0.811  | 0.361  | 0.394  |
| Vv-c | R |       |       |        | 0.645  | <b>0.823</b> | 0.295  | 0.195  | 0.207  | -0.137 | 0.069  |
|      | P |       |       |        | 0.118  | <b>0.023</b> | 0.521  | 0.675  | 0.655  | 0.769  | 0.883  |
| nPPa | R |       |       |        |        | <b>0.954</b> | 0.461  | 0.272  | 0.177  | 0.433  | 0.229  |
|      | P |       |       |        |        | <b>0.001</b> | 0.298  | 0.556  | 0.703  | 0.332  | 0.621  |
| Vv-r | R |       |       |        |        |              | 0.424  | 0.293  | 0.229  | 0.314  | 0.269  |
|      | P |       |       |        |        |              | 0.343  | 0.524  | 0.622  | 0.494  | 0.560  |
| Vc   | R |       |       |        |        |              |        | 0.367  | -0.679 | 0.130  | -0.212 |
|      | P |       |       |        |        |              |        | 0.419  | 0.094  | 0.781  | 0.649  |
| Vs   | R |       |       |        |        |              |        |        | 0.072  | -0.100 | -0.501 |
|      | P |       |       |        |        |              |        |        | 0.877  | 0.832  | 0.252  |
| Vd   | R |       |       |        |        |              |        |        |        | -0.163 | 0.257  |
|      | P |       |       |        |        |              |        |        |        | 0.728  | 0.577  |
| TL   | R |       |       |        |        |              |        |        |        |        | 0.551  |
|      | P |       |       |        |        |              |        |        |        |        | 0.200  |

**Table S4.** Pearson correlation coefficients (R) and *P*-values (P) of *cfos* cell densities in brain nuclei of subject gravid females in auditory conditions (reproductive auditory signals). Bold indicates significant differences at  $P < 0.05$ .

|      |   | Vv-r  | TPp    | Vc     | DI-g         | Vv-c   | nPPa              | Vs           | Vd           | TL     | TS            |
|------|---|-------|--------|--------|--------------|--------|-------------------|--------------|--------------|--------|---------------|
| ATn  | R | 0.496 | 0.679  | -0.257 | -0.298       | 0.182  | 0.194             | 0.110        | -0.005       | -0.695 | -0.517        |
|      | P | 0.211 | 0.139  | 0.064  | 0.538        | 0.473  | 0.666             | 0.646        | 0.795        | 0.990  | 0.056         |
| Vv-r | R |       | -0.090 | -0.306 | -0.095       | 0.098  | 0.076             | 0.146        | -0.228       | -0.594 | <b>-0.821</b> |
|      | P |       | 0.832  | 0.461  | 0.823        | 0.818  | 0.857             | 0.729        | 0.587        | 0.121  | <b>0.013</b>  |
| TPp  | R |       |        | -0.339 | -0.345       | 0.093  | 0.064             | 0.109        | 0.003        | -0.514 | -0.065        |
|      | P |       |        | 0.412  | 0.402        | 0.826  | 0.880             | 0.798        | 0.994        | 0.193  | 0.879         |
| Vc   | R |       |        |        | <b>0.743</b> | -0.236 | -0.040            | -0.430       | 0.349        | 0.394  | 0.134         |
|      | P |       |        |        | <b>0.035</b> | 0.574  | 0.925             | 0.288        | 0.396        | 0.335  | 0.752         |
| DI-g | R |       |        |        |              | 0.126  | 0.315             | 0.077        | 0.606        | 0.563  | -0.187        |
|      | P |       |        |        |              | 0.767  | 0.447             | 0.856        | 0.111        | 0.146  | 0.658         |
| Vv-c | R |       |        |        |              |        | <b>0.942</b>      | <b>0.931</b> | <b>0.771</b> | 0.351  | -0.400        |
|      | P |       |        |        |              |        | <b>&lt; 0.001</b> | <b>0.001</b> | <b>0.025</b> | 0.393  | 0.327         |
| nPPa | R |       |        |        |              |        |                   | <b>0.894</b> | <b>0.896</b> | 0.427  | -0.331        |
|      | P |       |        |        |              |        |                   | <b>0.003</b> | <b>0.003</b> | 0.291  | 0.423         |
| Vs   | R |       |        |        |              |        |                   |              | 0.671        | 0.329  | -0.332        |
|      | P |       |        |        |              |        |                   |              | 0.068        | 0.426  | 0.422         |
| Vd   | R |       |        |        |              |        |                   |              |              | 0.642  | -0.128        |
|      | P |       |        |        |              |        |                   |              |              | 0.086  | 0.762         |
| TL   | R |       |        |        |              |        |                   |              |              |        | 0.399         |
|      | P |       |        |        |              |        |                   |              |              |        | 0.328         |

**Table S5.** Pearson correlation coefficients (R) and *P*-values (P) of *cfos* cell densities in brain nuclei of subject gravid females in visual conditions (reproductive visual signals). Bold indicates significant differences at  $P < 0.05$ .

|      |   | TPp   | TL           | TS           | Vv-c         | DI-g   | Vs     | nPPa   | Vd     | Vc           | Vv-r         |
|------|---|-------|--------------|--------------|--------------|--------|--------|--------|--------|--------------|--------------|
| ATn  | R | 0.782 | <b>0.901</b> | <b>0.974</b> | <b>0.891</b> | -0.197 | -0.169 | 0.247  | 0.514  | 0.662        | 0.641        |
|      | P | 0.066 | <b>0.001</b> | <b>0.014</b> | <b>0.017</b> | 0.708  | 0.748  | 0.637  | 0.297  | 0.152        | 0.170        |
| TPp  | R |       | 0.582        | 0.720        | 0.558        | -0.670 | -0.172 | 0.080  | 0.249  | 0.451        | 0.494        |
|      | P |       | 0.106        | 0.255        | 0.250        | 0.145  | 0.745  | 0.880  | 0.634  | 0.370        | 0.319        |
| TL   | R |       |              | <b>0.906</b> | <b>0.957</b> | 0.131  | -0.038 | 0.186  | 0.358  | 0.647        | 0.531        |
|      | P |       |              | <b>0.013</b> | <b>0.003</b> | 0.805  | 0.943  | 0.725  | 0.486  | 0.165        | 0.278        |
| TS   | R |       |              |              | <b>0.947</b> | -0.193 | -0.320 | 0.063  | 0.450  | 0.623        | 0.496        |
|      | P |       |              |              | <b>0.004</b> | 0.714  | 0.536  | 0.906  | 0.371  | 0.186        | 0.317        |
| Vv-c | R |       |              |              |              | 0.017  | -0.198 | -0.047 | 0.262  | 0.516        | 0.339        |
|      | P |       |              |              |              | 0.974  | 0.707  | 0.930  | 0.616  | 0.295        | 0.511        |
| DI-g | R |       |              |              |              |        | 0.366  | 0.370  | 0.137  | 0.150        | 0.103        |
|      | P |       |              |              |              |        | 0.475  | 0.470  | 0.796  | 0.777        | 0.846        |
| Vs   | R |       |              |              |              |        |        | 0.400  | -0.337 | -0.340       | 0.070        |
|      | P |       |              |              |              |        |        | 0.432  | 0.513  | 0.509        | 0.895        |
| nPPa | R |       |              |              |              |        |        |        | 0.708  | 0.570        | <b>0.864</b> |
|      | P |       |              |              |              |        |        |        | 0.115  | 0.237        | <b>0.026</b> |
| Vd   | R |       |              |              |              |        |        |        |        | <b>0.863</b> | <b>0.851</b> |
|      | P |       |              |              |              |        |        |        |        | <b>0.027</b> | <b>0.032</b> |
| Vc   | R |       |              |              |              |        |        |        |        |              | <b>0.852</b> |
|      | P |       |              |              |              |        |        |        |        |              | <b>0.031</b> |

**Table S6.** Pearson correlation coefficients (R) and *P*-values (P) of *cfos* cell densities in brain nuclei of subject gravid females in audio-visual conditions (reproductive auditory and visual signals). Bold indicates significant differences at  $P < 0.05$ .

|      |   | nPPa         | Vd           | Vc    | DI-g  | Vs    | TL           | TS     | Vv-r   | Vv-c   | TPp    |
|------|---|--------------|--------------|-------|-------|-------|--------------|--------|--------|--------|--------|
| ATn  | R | <b>0.806</b> | <b>0.903</b> | 0.471 | 0.244 | 0.530 | -0.076       | -0.604 | 0.011  | -0.523 | -0.102 |
|      | P | <b>0.029</b> | <b>0.005</b> | 0.286 | 0.598 | 0.222 | 0.872        | 0.151  | 0.982  | 0.229  | 0.828  |
| nPPa | R |              | <b>0.841</b> | 0.627 | 0.283 | 0.470 | -0.020       | -0.476 | -0.040 | -0.010 | 0.271  |
|      | P |              | <b>0.018</b> | 0.132 | 0.539 | 0.288 | 0.966        | 0.280  | 0.933  | 0.982  | 0.557  |
| Vd   | R |              |              | 0.338 | 0.444 | 0.611 | 0.167        | -0.512 | -0.020 | -0.248 | 0.304  |
|      | P |              |              | 0.459 | 0.318 | 0.145 | 0.720        | 0.240  | 0.966  | 0.592  | 0.507  |
| Vc   | R |              |              |       | 0.371 | 0.264 | 0.088        | 0.000  | -0.145 | -0.240 | -0.075 |
|      | P |              |              |       | 0.413 | 0.568 | 0.852        | 1.000  | 0.757  | 0.604  | 0.873  |
| DI-g | R |              |              |       |       | 0.677 | <b>0.896</b> | 0.382  | 0.292  | -0.024 | 0.503  |
|      | P |              |              |       |       | 0.095 | <b>0.006</b> | 0.397  | 0.526  | 0.959  | 0.250  |
| Vs   | R |              |              |       |       |       | 0.683        | 0.268  | 0.610  | 0.030  | 0.417  |
|      | P |              |              |       |       |       | 0.091        | 0.561  | 0.146  | 0.950  | 0.352  |
| TL   | R |              |              |       |       |       |              | 0.690  | 0.443  | 0.230  | 0.620  |
|      | P |              |              |       |       |       |              | 0.087  | 0.319  | 0.619  | 0.138  |
| TS   | R |              |              |       |       |       |              |        | 0.376  | 0.414  | 0.332  |
|      | P |              |              |       |       |       |              |        | 0.405  | 0.356  | 0.467  |
| Vv-r | R |              |              |       |       |       |              |        |        | 0.194  | 0.043  |
|      | P |              |              |       |       |       |              |        |        | 0.677  | 0.927  |
| Vv-c | R |              |              |       |       |       |              |        |        |        | 0.721  |
|      | P |              |              |       |       |       |              |        |        |        | 0.067  |
